# Supplementary material
Source: PubMed Central journal article supplement (PMC4403006)
Supplement: NIHMS313796-supplement-suppl_data.pdf [file NIHMS313796-supplement-suppl_data.pdf]

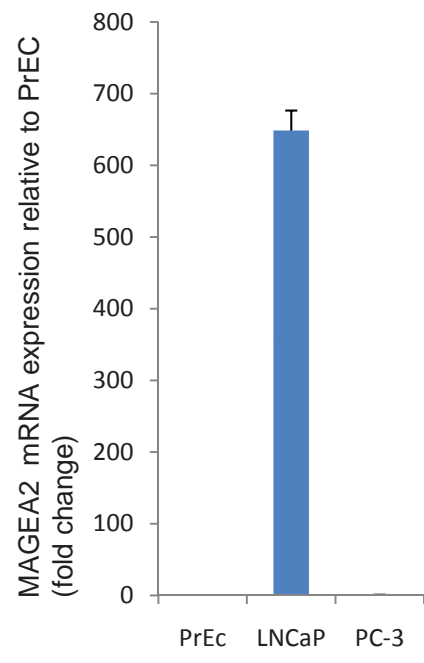

Supplemental Fig. 1

| <b>Age</b> | <b>Race</b>      | <b>T-stage</b> | <b>Pre-PSA</b> | <b>RRP Gleason</b> | <b>Prostate Weight</b> | <b>Status</b>                     |
|------------|------------------|----------------|----------------|--------------------|------------------------|-----------------------------------|
| 72         | Caucasian        | T2a            | 2.5            | 8                  | 46.7                   | Died- unknown cause               |
| 56         | African-American | T2b            | 11.6           | 6                  | 57                     |                                   |
| 56         | Caucasian        | T1c            | 6.5            | 8                  | 44.9                   | No Recurrence                     |
| 64         | Caucasian        | T2a            | 7.8            | 7                  | 96.09                  | Increase in PSA (>0.2)            |
| 49         | African-American | T1c            | 4.59           | 6                  | 35.7                   | No Recurrence                     |
| 61         | Caucasian        | T2a            | 4.9            | 7                  | 79.5                   | Distant Mets                      |
| 66         | Caucasian        | T2b            | 4.5            | 6                  | 60.2                   | Increase in PSA (>0.2)            |
| 60         | Caucasian        | T2b            | 6.19           | 9                  | 37.9                   | Increase in PSA (>0.2)            |
| 45         | Caucasian        | T1c            | 6              | 7                  | 44                     | Local Recurrence and Distant Mets |
| 56         | Caucasian        | T1c            | 4.3            | 6                  | 40                     | No Recurrence                     |

**Supplemental Table 1**

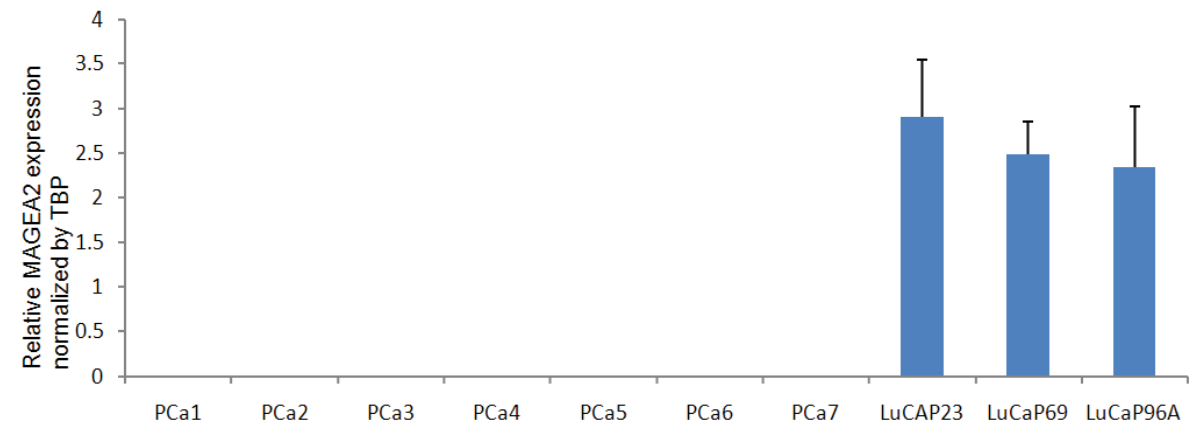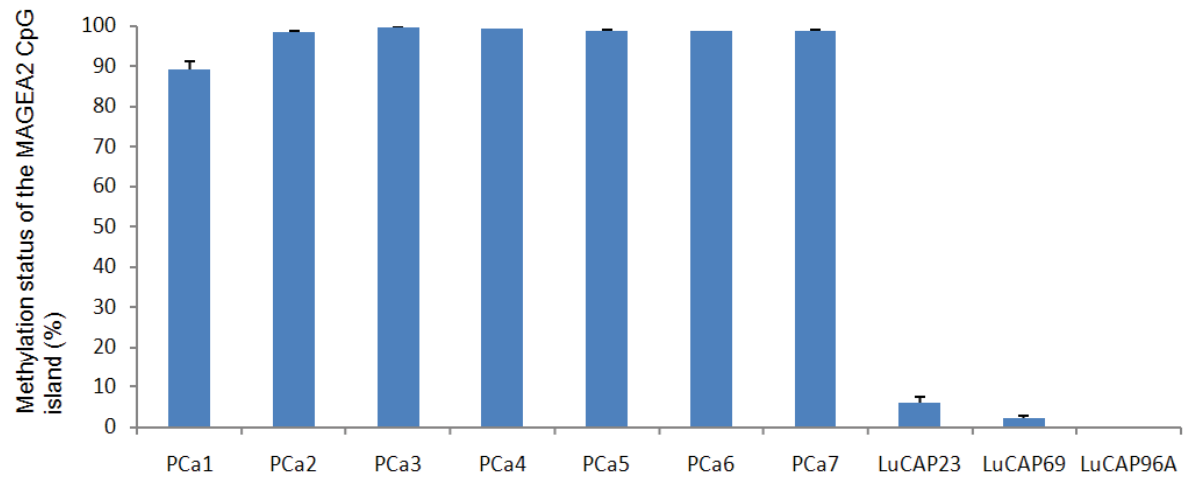

Supplemental Fig. 3

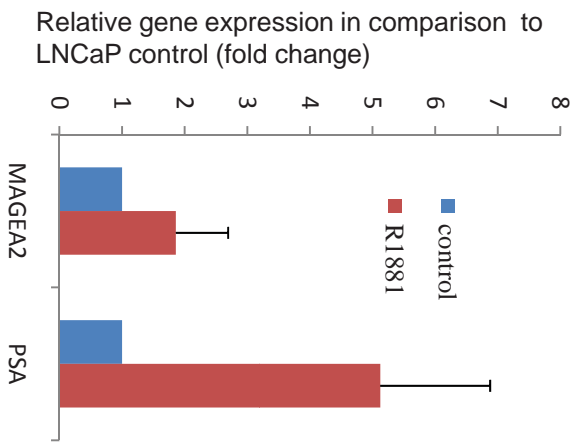

Supplemental Fig. 2

| <b>LuCaP #</b> | <b>Location of the Tumor</b> | <b>Histology</b>     | <b>Patient Androgen Status</b> | <b>Xenograft Androgen Status</b> | <b>PSA Producer</b> |
|----------------|------------------------------|----------------------|--------------------------------|----------------------------------|---------------------|
| 23.1           | Lymph node                   | Adenocarcinoma       | Castration-resistant           | Dependent                        | Yes                 |
| 35             | Inguinal LN                  | Adenocarcinoma       | Castration-resistant           | Dependent                        | Yes                 |
| 49             | Omental fat met              | Small cell carcinoma | Hormone-naive                  | Independent                      | No                  |
| 58             | Lymph node                   | Adenocarcinoma       | Hormone-naive                  | Dependent                        | Yes                 |
| 69             | Bowel met                    | Adenocarcinoma       | Castration-resistant           | Dependent                        | Yes                 |
| 70             | Liver met                    | Adenocarcinoma       | Castration-resistant           | Dependent                        | Yes                 |
| 73             | Prostate                     | Adenocarcinoma       | Castration-resistant           | Dependent                        | Yes                 |
| 77             | Femur met                    | Adenocarcinoma       | Castration-resistant           | Dependent                        | Yes                 |
| 86.2           | Bladder met                  | Adenocarcinoma       | Castration-resistant           | NA                               | Yes                 |
| 93             | Prostate from TURP           | Small cell carcinoma | Hormone-naive                  | Independent                      | No                  |
| 96             | Prostate from TURP           | Adenocarcinoma       | Castration-resistant           | Dependent                        | Yes                 |
| 105            | Rib mets R5, L5              | Adenocarcinoma       | Castration-resistant           | Dependent                        | Yes                 |
| 115            | Lymph node                   | Adenocarcinoma       | Hormone-naive                  | NA                               | Yes                 |

**Supplemental Table 2**
